# Supplementary material for: Antibiotic Use and Long-Term Outcome in Patients with Tick-Borne Encephalitis and Co-Infection with Borrelia Burgdorferi Sensu Lato in Central Europe. A Retrospective Cohort Study
Source: PubMed Central journal article supplement (PMC6832614; doi:10.3390/jcm8101740), 2019-10-20
Supplement: jcm-08-01740-s001.pdf [file jcm-08-01740-s001.pdf]

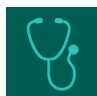

## Supplementary Materials

**Table S1.** Demographic, clinical, and laboratory characteristics of patients with tick-borne encephalitis on admission in relation to positive or negative test result for IgM or IgG antibodies to *B. burgdorferi sensu lato*.

| Characteristic                          | <i>Borrelia</i>                | <i>Borrelia</i>                | <i>p</i> Value |
|-----------------------------------------|--------------------------------|--------------------------------|----------------|
|                                         | seropositive<br><i>n</i> = 282 | seronegative<br><i>n</i> = 402 |                |
| Age                                     | 59 (46–69)                     | 49 (35–61)                     | <0.001         |
| Male sex                                | 176 (62.4)                     | 219 (54.5)                     | 0.047          |
| Charlson comorbidity index              | 2 (0–3)                        | 1 (0–2)                        | <0.001         |
| Vaccinated against TBE                  | 14 (5.0)                       | 14 (3.5)                       | 0.443          |
| Clinical presentation                   |                                |                                |                |
| Meningitis                              | 61 (21.6)                      | 96 (23.9)                      | 0.778          |
| Meningoencephalitis                     | 196 (69.5)                     | 270 (67.2)                     |                |
| Meningoencephalomyelitis                | 25 (8.9)                       | 36 (9.0)                       |                |
| Severity of acute illness               |                                |                                |                |
| Mild                                    | 103 (25.7)                     | 66 (23.4)                      | 0.374          |
| Moderate                                | 246 (61.4)                     | 169 (59.9)                     |                |
| Severe                                  | 52 (13.0)                      | 47 (16.7)                      |                |
| Severity score of acute illness         | 12 (9–19)                      | 12 (8–17)                      | 0.229          |
| CSF leukocyte count ( $\times 10^6/L$ ) | 75.5 (40–138)                  | 105 (55–188.3)                 | <0.001         |

Data are median (interquartile range) or number (%) of patients. Abbreviations: CSF, cerebrospinal fluid.

**Table S2.** Demographic, clinical, and laboratory characteristics of patients with tick-borne encephalitis and possible borrelial co-infection according to whether or not they received anti-borrelial antibiotic therapy.

| Characteristic                          | Anti-borrelial antibiotic therapy |                     | <i>p</i> Value |
|-----------------------------------------|-----------------------------------|---------------------|----------------|
|                                         | Yes<br><i>n</i> = 144             | No<br><i>n</i> = 96 |                |
| Age                                     | 61 (50.8–69)                      | 53.5 (41.8–67)      | <b>0.006</b>   |
| Male sex                                | 94 (65.3)                         | 54 (56.3)           | 0.203          |
| Charlson comorbidity index              | 2 (1–3)                           | 1 (0–3)             | <b>0.006</b>   |
| Vaccinated against TBE                  | 9 (6.3)                           | 3 (3.1)             | 0.371          |
| Clinical presentation                   |                                   |                     |                |
| Meningitis                              | 35 (24.3)                         | 15 (15.6)           | 0.268          |
| Meningoencephalitis                     | 97 (67.4)                         | 72 (75.0)           |                |
| Meningoencephalomyelitis                | 12 (8.3)                          | 9 (9.4)             |                |
| Severity of acute illness               |                                   |                     |                |
| Mild                                    | 35 (24.3)                         | 19 (19.8)           | 0.554          |
| Moderate                                | 83 (57.6)                         | 62 (64.6)           |                |
| Severe                                  | 26 (18.1)                         | 15 (15.6)           |                |
| Severity score of acute illness         | 13 (9–20)                         | 12 (10–18.3)        | 0.858          |
| CSF leukocyte count ( $\times 10^6/L$ ) | 67 (35–129.3)                     | 74.5 (34.5–138.3)   | 0.968          |

Data are median (interquartile range) or number (%) of patients.

**Table S3.** Number (%) of patients with tick-borne encephalitis and possible borrelial co-infection who had incomplete recovery at follow-up visits in relation to whether or not they received anti-borrelial antibiotic therapy.

|                          | All<br><i>n</i> = 240 | Anti-borrelial antibiotic therapy |                     | <i>p</i> Value <sup>a</sup> |
|--------------------------|-----------------------|-----------------------------------|---------------------|-----------------------------|
|                          |                       | Yes<br><i>n</i> = 144             | No<br><i>n</i> = 96 |                             |
| 2 months post-enrolment  | 129/232 (55.6)        | 77/140 (55.0%)                    | 52/92 (56.5%)       | 0.926                       |
| 6 months post-enrolment  | 72/192 (37.5)         | 48/122 (39.3)                     | 24/70 (34.3)        | 0.588                       |
| 12 months post-enrolment | 41/128 (32.0)         | 29/94 (30.9)                      | 12/34 (35.3)        | 0.794                       |
| At final evaluable visit | 75/233 (32.2)         | 43/140 (30.7)                     | 32/93 (34.4)        | 0.654                       |

<sup>a</sup> Overall *p* value for comparisons between groups was estimated using the normal approximation with continuity correction; *p* < 0.05 was considered significant.
